# Supplementary material for: Nanocapsule designs for antimicrobial resistance
Source: Royal Society of Chemistry journal article supplement (doi:10.1039/d0nr08146a), 2021-01-01
Supplement: d0nr08146a1.pdf [file d0nr08146a1.pdf]

---

Supporting Information:  
Nanocapsule Designs for Antimicrobial Resistance

---

Irene Marzuoli<sup>a</sup>, Carlos H.B. Cruz<sup>a</sup>, Christian D. Lorenz<sup>b</sup>, and Franca Fraternali<sup>a</sup>

<sup>a</sup>Randall Centre for Cell and Molecular Biology, King's College London, London, U.K.

<sup>b</sup>Department of Physics, King's College London, London, U.K.

## List of Tables

|   |                                                                          |   |
|---|--------------------------------------------------------------------------|---|
| 1 | Characteristics of the capzip and AM- $\beta$ -annulus capsules. . . . . | 3 |
| 2 | Area per Lipid of DLPC/DLPG 3:1 membrane without peptides . . . . .      | 5 |

## List of Figures

|   |                                                                                                                       |   |
|---|-----------------------------------------------------------------------------------------------------------------------|---|
| 1 | Alignment of Wild Type $\beta$ -annulus and functionalised peptides . . . . .                                         | 3 |
| 2 | Radius of gyration of capzip and AM- $\beta$ -annulus capsules for atomistic and coarse-grained simulations . . . . . | 4 |
| 3 | Side chains/backbone hydrogen bonds for atomistic simulation of capzip capsule                                        | 4 |
| 4 | Lateral density profile of lipid membrane components in atomistic simulations.                                        | 5 |
| 5 | Tail order parameter of lipid membrane components in atomistic simulations.                                           | 6 |
| 6 | RDF of capzip capsule amino acids around bacterial membrane lipid moieties (MARTINI simulation) . . . . .             | 7 |
| 7 | RDF of capzip capsule amino acids around bacterial membrane lipid moieties (MARTINI simulation) . . . . .             | 7 |

|    |                                                                                                                                                       |   |
|----|-------------------------------------------------------------------------------------------------------------------------------------------------------|---|
| 8  | RDF of AM- $\beta$ -annulus capsule <i>hydrophobic</i> amino acids around bacterial membrane lipid moieties (SIRAH simulation) . . . . .              | 8 |
| 9  | RDF of AM- $\beta$ -annulus capsule <i>polar</i> and <i>special</i> amino acids around bacterial membrane lipid moieties (SIRAH simulation) . . . . . | 8 |
| 10 | Capzip capsule on a LPS membrane (MARTINI simulation) - snapshot and lateral densities . . . . .                                                      | 9 |

|                                             | Capzip                | AM- $\beta$ -annulus |
|---------------------------------------------|-----------------------|----------------------|
| Shape                                       | Truncated icosahedron | Dodecahedron         |
| Nr molecules                                | 120                   | 60                   |
| Net charge                                  | + 720 $e$             | + 180 $e$            |
| SASA                                        | 2094 nm <sup>2</sup>  | 1100 nm <sup>2</sup> |
| Q <sub>SASA</sub> (positive amino acids)    | 0.55                  | 0.30                 |
| Q <sub>SASA</sub> (negative amino acids)    | 0.10                  | 0.06                 |
| Q <sub>SASA</sub> (polar amino acids)       | 0.10                  | 0.16                 |
| Q <sub>SASA</sub> (hydrophobic amino acids) | 0.25                  | 0.48                 |

Table 1: **Characteristics of the capzip and AM- $\beta$ -annulus capsules.**

| <b><math>\beta</math>-annulus</b> | <b>Sequence</b>           | <b>REU</b> |
|-----------------------------------|---------------------------|------------|
| WT                                | ITHVGGVGGSIMAPVAVSRQLVGS  | -2272.71   |
| AM (not soluble)                  | ITHVGGVGGSIMAPVAVSRRWTWE  | -2062.63   |
| AM                                | INHVGGVKGSIMAPVSVSRRWTWE  | -2543.30   |
|                                   | * . ***** *****;*** . . . |            |

Figure 1: **Alignment of  $\beta$ -annulus sequences:** Wild Type, with grafted antimicrobial sequence (AM, not soluble) and with antimicrobial sequence and three mutated residue to improve AM- $\beta$ -annulus capsule solubility. On the right, the Rosetta Energy Units of the dodecahedron generated with the three sequences.

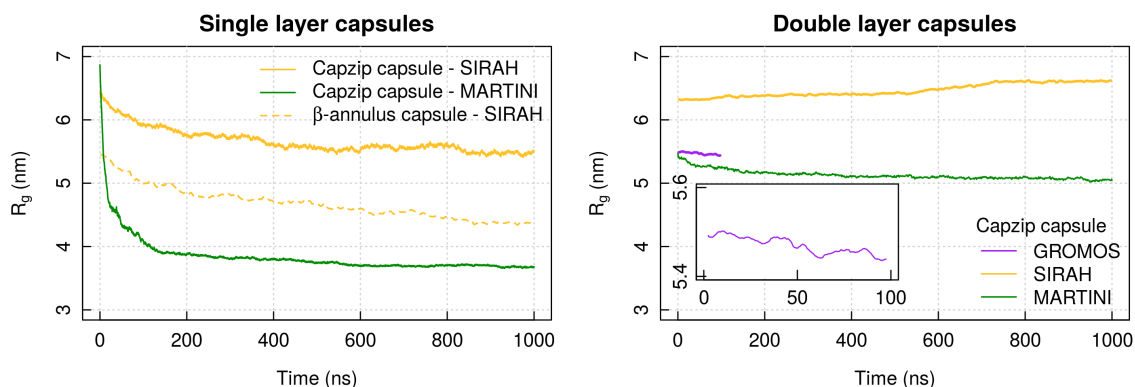

Figure 2: Simulations of single layer capzip and AM- $\beta$ -annulus capsules (left) and double layer capzip capsule (right) at atomistic and coarse-grained level: radius of gyration  $R_g$  computed on the protein backbone of the capsule. Inset: zoom on the atomistic GROMOS atomistic  $R_g$ .

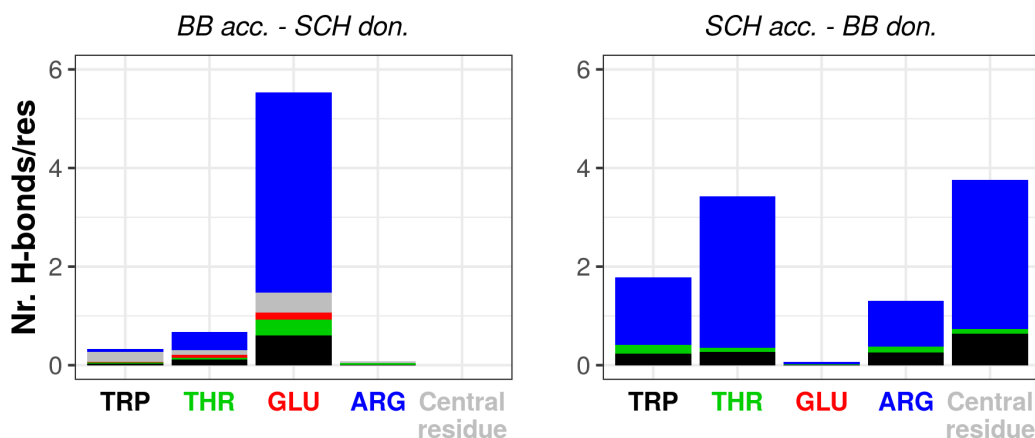

Figure 3: Atomistic simulation of capzip capsule (replica 1): average number of hydrogen bonds per residue occurring between amino acids backbone and side chains in the last 50 ns of simulation (Central residue refers to the moiety linking the antimicrobial arms - see Figure 1 in the main text). For each bar, the residue on the  $x$ -axis is the acceptor, and the bar is split by the identity of the donors.

| <b>GROMOS simulations</b>        |           |                        |
|----------------------------------|-----------|------------------------|
| Nr. lipids                       | E (mV/nm) | ApL (nm <sup>2</sup> ) |
| 740                              | –         | 0.569(4)               |
| 740                              | -20       | 0.568(3)               |
| <b>Polar MARTINI simulations</b> |           |                        |
| 2880                             | –         | 0.611(1)               |
| 2880                             | -20       | 0.614(1)               |
| 2880                             | -40       | 0.619(2)               |

Table 2: **Membrane alone simulations.** Area per Lipid (ApL) of DLPC/DLPG 3:1 membrane simulated with atomistic and coarse-grained resolution, at 150 mM NaCl salt concentration, with and without electric field (E). For comparison, experimental values for a DLPC bilayer (without salt) are: 0.608-0.632 nm<sup>2</sup> for ApL[2], and 3  $\mu\text{m}^2$  for D.[1] Experimental values for DLPC/DLPG 3:1 not assessed at the time of the publication.

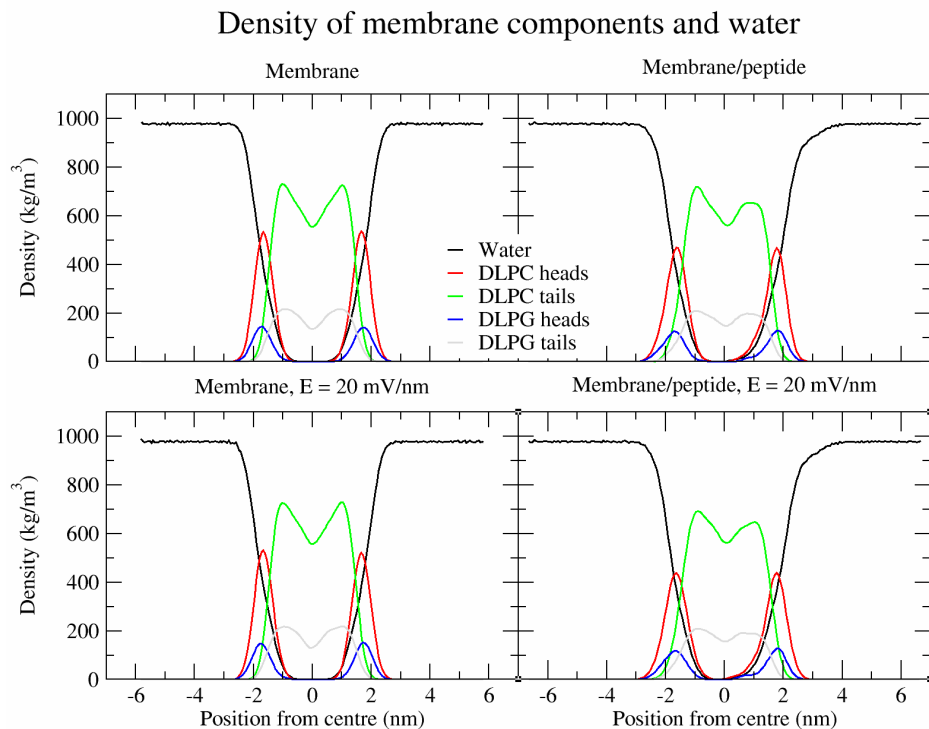

Figure 4: **Membrane alone simulations.** Lateral density profile of lipid components in atomistic simulations of DLPC/DLPG 3:1 membrane, with and without electric field, with and without capzip peptide.

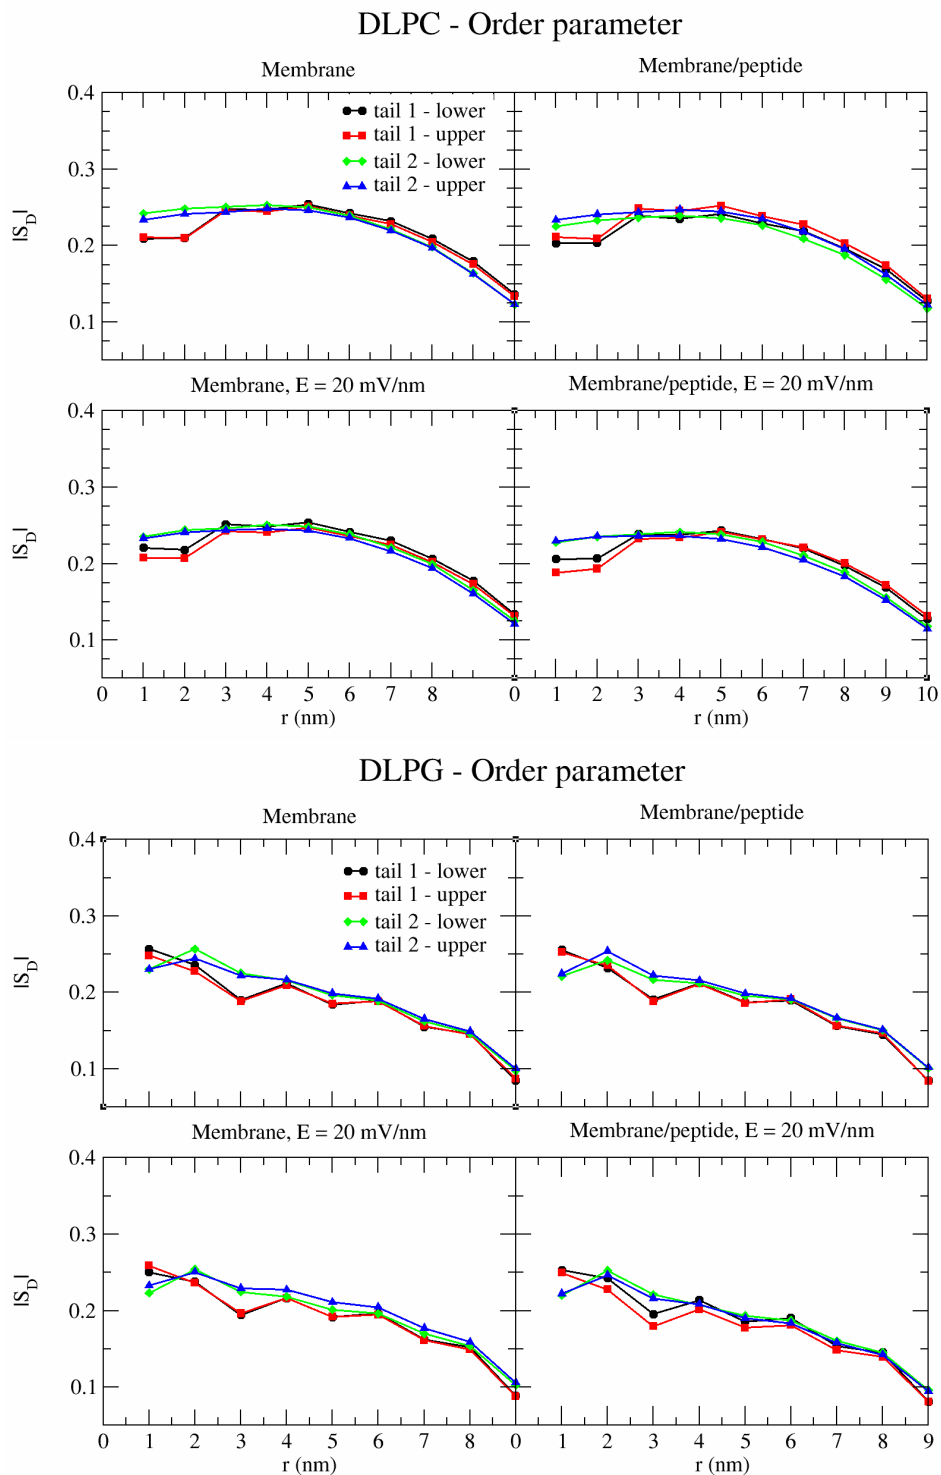

Figure 5: **Membrane alone simulations.** Tail order parameter for both DLPC and DLPG in atomistic simulations of a DLPC/DLPG 3:1 membrane, with and without electric field, with and without capzip peptide.

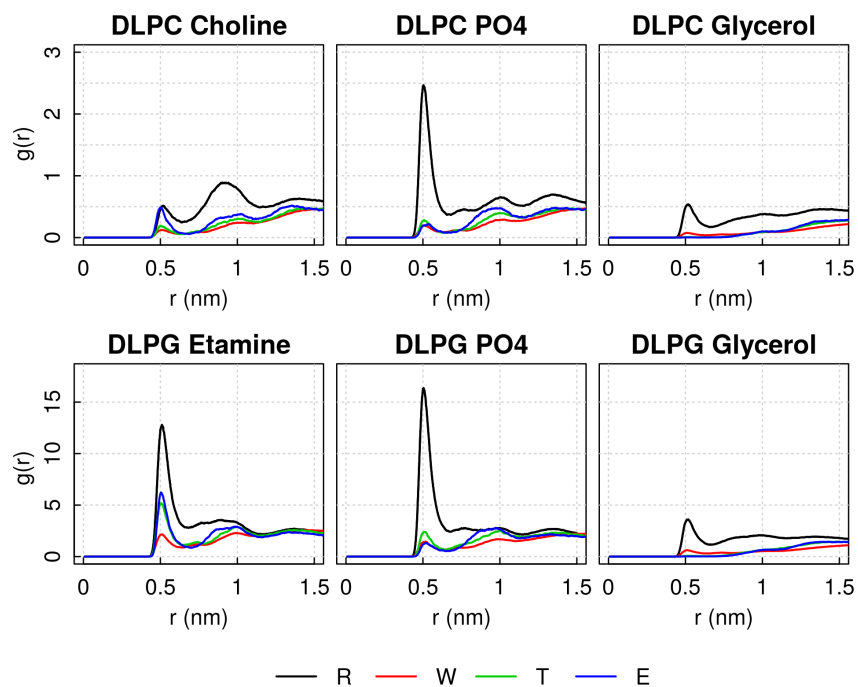

Figure 6: **MARTINI simulation of capzip capsule on a bacterial model membrane:** Radial Distribution Function of capzip amino acids around typical moieties of lipids heads, averaged over the time simulated after the capsule binding.

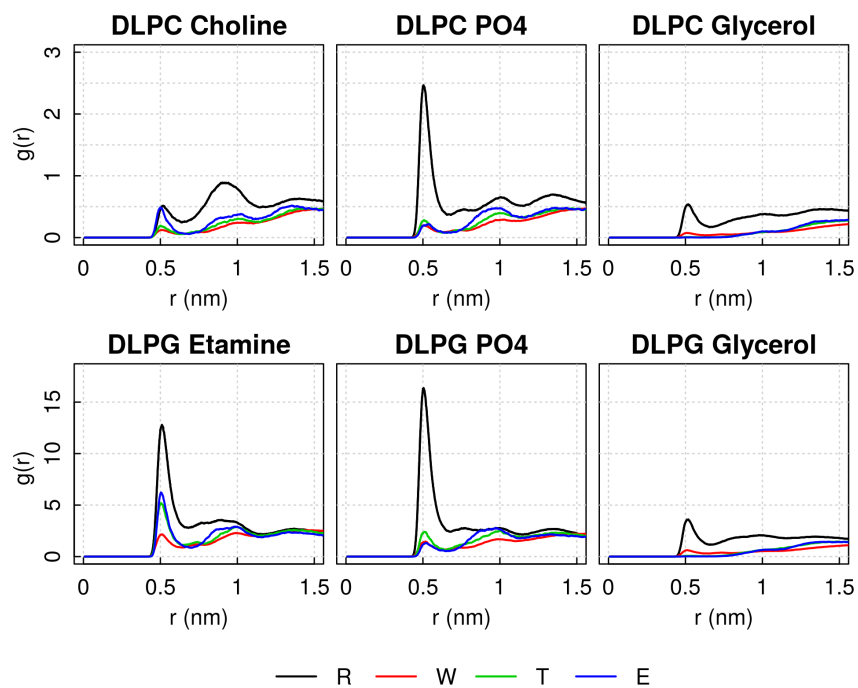

Figure 7: As in Figure 6, for SIRAH simulation.

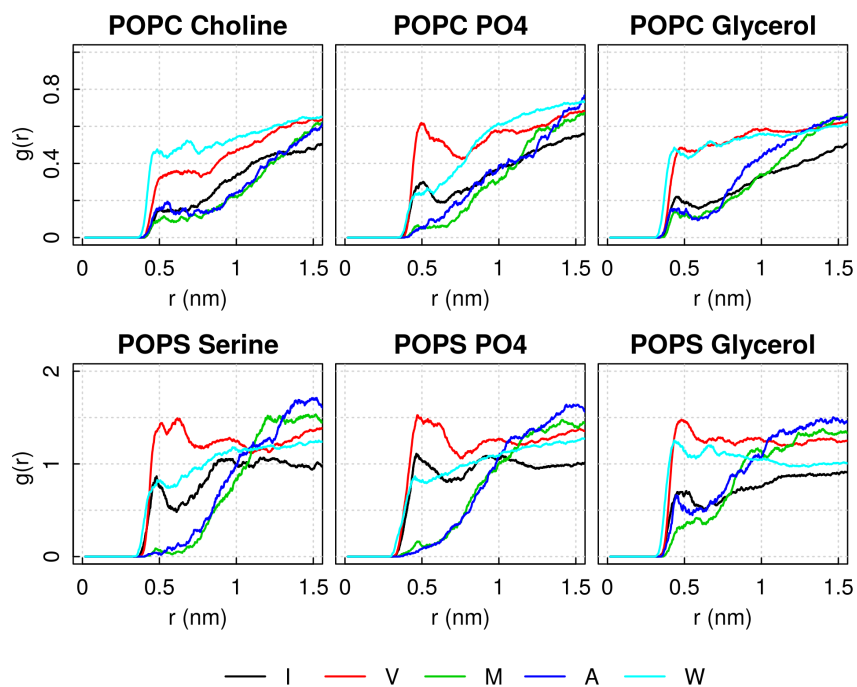

Figure 8: **SIRAH simulation of AM- $\beta$ -annulus capsule on a bacterial model membrane:** Radial Distribution Function of AM- $\beta$ -annulus *hydrophobic* amino acids around 1 typical moieties of lipids heads, averaged over the time simulated after the capsule binding.

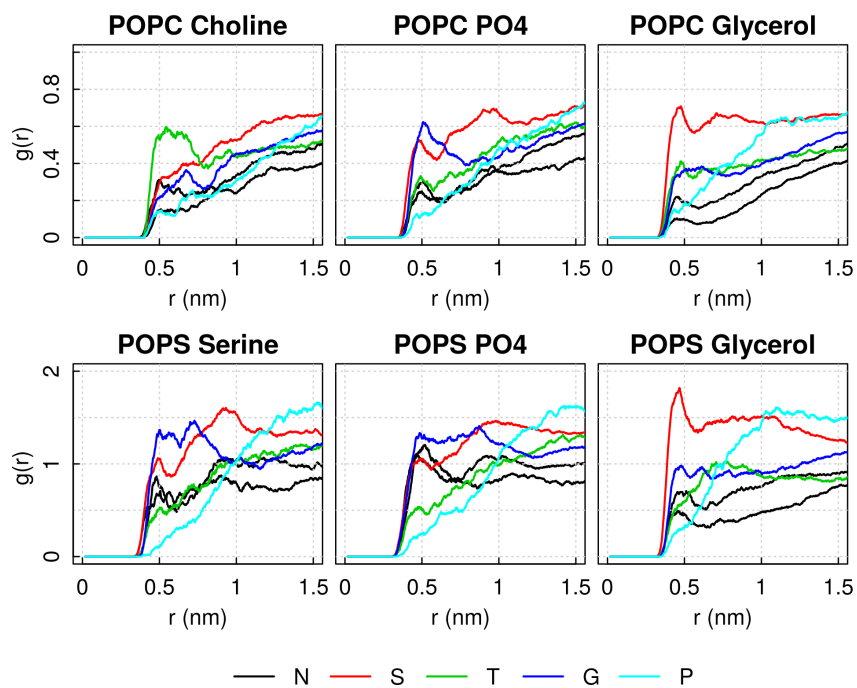

Figure 9: As in Figure 8, for *polar* and *special* amino acids.



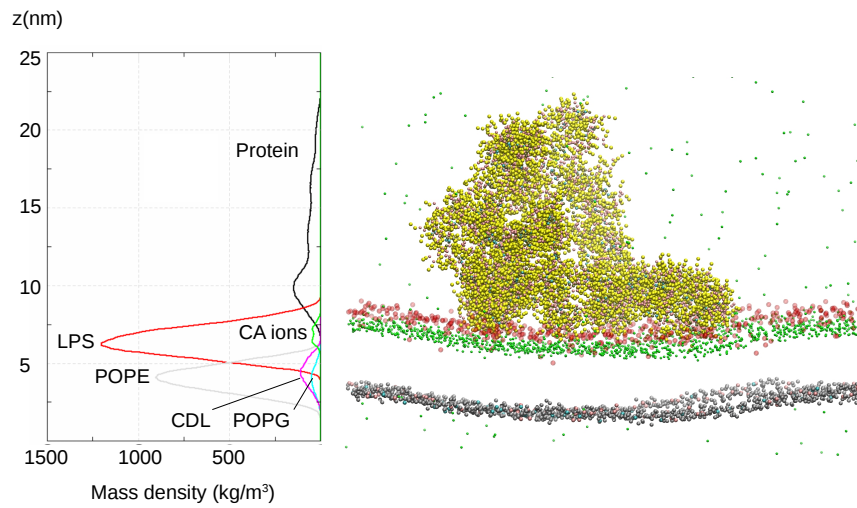

Figure 10: **MARTINI simulation of capzip capsule on a LPS (top) and POPE/POPG/CDL 85:5:10 (bottom leaflet) membrane.** Left: mass density profile along  $z$  averaged over after the stabilisation of capzip capsule on the membrane (at 600 ns). Right: snapshot of the final configuration ( $1 \mu\text{s}$ ). Peptides shown in van der Waals representation; phosphate beads of POPE, POPG and CDL shown in grey, cyan and pink beads respectively. The top layer of LPS molecules (beads S10) shown as red transparent beads, CA ions as green small beads.
